# Supplementary material for: Screening and identification of differentially expressed long non-coding RNAs in multidrug-resistant tuberculosis
Source: PeerJ journal article supplement (doi:10.7717/peerj.12776), 2022-01-17
Supplement: Excel_S1.xlsx [file Excel_S1.xlsx]

## Sheet: LncRNA
MDR-TB up-regulated	MDR-TB dwn-regulated	DS-TB up-regulated	DS-TB down-regulated
n379409	TCONS_00006679-XLOC_003276	TCONS_l2_00024066-XLOC_l2_012420	TCONS_00006679-XLOC_003276
n339400	n337123	TCONS_00004331-XLOC_002204	TCONS_l2_00008237-XLOC_l2_004507
TCONS_00017638-XLOC_008297	TCONS_l2_00019220-XLOC_l2_010150	n341619	n335717
NR_024321	n335632	n342637	n335589
n340313	TCONS_l2_00008237-XLOC_l2_004507	TCONS_00000801-XLOC_000017	n335609
n406847	TCONS_l2_00006698-XLOC_l2_003613	TCONS_00025267-XLOC_012072	n335594
n342571	n335659	n340998	TCONS_l2_00001418-XLOC_l2_001029
ENST00000540171	NR_001564	n334650	n335710
n338390	n338129	TCONS_00011862-XLOC_005354	n383080
n338692	n335670	n324052	n335687
n324815	n339260	ENST00000458413	TCONS_l2_00030186-XLOC_l2_015498
TCONS_00004641-XLOC_002554	TCONS_l2_00003552-XLOC_l2_001966	TCONS_00017955-XLOC_008785	n346088
TCONS_l2_00020871-XLOC_l2_010933	n341518	TCONS_l2_00030421-XLOC_l2_015661	n343017
TCONS_00029180-XLOC_014119	TCONS_l2_00005430-XLOC_l2_002852	TCONS_00028006-XLOC_013654	n335670
OTTHUMT00000080886	n339841	n324217	TCONS_l2_00019220-XLOC_l2_010150
ENST00000452889	TCONS_00028359-XLOC_013714	TCONS_l2_00012221-XLOC_l2_006548	n335642
NR_001540	ENST00000458293	TCONS_00007758-XLOC_003943	n335671
TCONS_00020754-XLOC_010043	TCONS_00019312-XLOC_009145	TCONS_00014721-XLOC_006811	NR_027451
TCONS_00010351-XLOC_004841	TCONS_00006565-XLOC_003194	n324587	TCONS_l2_00014091-XLOC_l2_007649
TCONS_00004363-XLOC_002243	n334561	n325341	n410458
TCONS_00016231-XLOC_007614	n342407	ENST00000532770	TCONS_l2_00012696-XLOC_l2_006815
n338721	TCONS_00000305-XLOC_000397	ENST00000455554	n335663
n336610	n339122	n338378	TCONS_l2_00006698-XLOC_l2_003613
n380637	n326226	TCONS_00008418-XLOC_003873	TCONS_l2_00013742-XLOC_l2_007406
TCONS_00006447-XLOC_003055	n335676	ENST00000508388	n338129
TCONS_00019680-XLOC_009480	ENST00000415932	n341686	n346533
n339440	n340232	TCONS_l2_00013127-XLOC_l2_007062	n335632
n324915	n342711	n326121	TCONS_l2_00030333-XLOC_l2_015600
TCONS_00007462-XLOC_003429	n337988	TCONS_00017234-XLOC_008054	TCONS_l2_00013175-XLOC_l2_007092
ENST00000424705	n380197	TCONS_l2_00026251-XLOC_l2_013636	n387718
TCONS_00024352-XLOC_011674	n339020	ENST00000437080	TCONS_l2_00026417-XLOC_l2_013738
TCONS_00014447-XLOC_006664	TCONS_00014735-XLOC_006820	TCONS_l2_00024507-XLOC_l2_012788	TCONS_l2_00003853-XLOC_l2_002176
ENST00000521991	ENST00000511721	TCONS_00009618-XLOC_004754	NR_037600
TCONS_00023841-XLOC_011615	TCONS_l2_00005763-XLOC_l2_003052	TCONS_00007800-XLOC_004026	TCONS_l2_00016171-XLOC_l2_008560
TCONS_00024900-XLOC_011819	n338027	TCONS_00007904-XLOC_004171	TCONS_00018467-XLOC_008769
n324587	TCONS_00020666-XLOC_009969	TCONS_00022170-XLOC_010374	TCONS_l2_00000739-XLOC_l2_000553
ENST00000419800	TCONS_00019149-XLOC_009180	n325818	TCONS_l2_00005546-XLOC_l2_002910
n340613	n332918	TCONS_00003578-XLOC_001352	n377717
n338061	n335620	TCONS_l2_00029297-XLOC_l2_015181	TCONS_l2_00030166-XLOC_l2_015473
TCONS_00011029-XLOC_004985	TCONS_00000586-XLOC_000935	TCONS_00024531-XLOC_011844	TCONS_l2_00004424-XLOC_l2_002252
ENST00000505636	n326705	TCONS_00010302-XLOC_004781	n339275
n342861		TCONS_00015796-XLOC_007653	TCONS_00014594-XLOC_006699
TCONS_00013699-XLOC_006357		n325792	n338711
ENST00000442318		ENST00000446404	n335618
ENST00000427145		n341968	TCONS_l2_00006336-XLOC_l2_003434
n324625		TCONS_00015819-XLOC_007701	n335676
n340790		ENST00000418607	n345917
TCONS_l2_00000051-XLOC_l2_000033		TCONS_00008726-XLOC_004234	n335631
TCONS_00004368-XLOC_002247		TCONS_00011925-XLOC_005435	TCONS_l2_00014773-XLOC_l2_008195
n340051		ENST00000509824	n342407
ENST00000542988		TCONS_00011213-XLOC_005697	n380137
n408064		TCONS_00017170-XLOC_007981	n344612
TCONS_00009389-XLOC_004352		ENST00000446201	n384624
TCONS_00010119-XLOC_004585		n337310	TCONS_l2_00019221-XLOC_l2_010151
TCONS_00029999-XLOC_014483		n325147	n335659
n338679		TCONS_00019144-XLOC_009158	n339394
TCONS_l2_00024198-XLOC_l2_012523		n345893	n335644
TCONS_00025333-XLOC_012145		ENST00000554798	n341829
TCONS_00016452-XLOC_007814		ENST00000443359	n338123
n342286		ENST00000504167	TCONS_l2_00009549-XLOC_l2_005089
TCONS_00025131-XLOC_012335		n323856	TCONS_l2_00005430-XLOC_l2_002852
TCONS_00017762-XLOC_008343		n337166	ENST00000447883
n337848		ENST00000449694	n345861
ENST00000423719		TCONS_00029531-XLOC_014174	n336641
TCONS_00024635-XLOC_011926		TCONS_00000553-XLOC_000883	n342232
TCONS_00009988-XLOC_004415		TCONS_00024372-XLOC_011696	NR_015370
TCONS_00011746-XLOC_005211		ENST00000523317	TCONS_00018392-XLOC_008674
TCONS_00009286-XLOC_004864		TCONS_00019182-XLOC_009017	n345031
n323935		TCONS_00029256-XLOC_014002	n335662
TCONS_00013573-XLOC_006226		TCONS_00019211-XLOC_009043	TCONS_l2_00008829-XLOC_l2_004791
n339366		ENST00000442389	TCONS_l2_00000553-XLOC_l2_000394
n339596		n345837	TCONS_l2_00027902-XLOC_l2_014294
TCONS_00020467-XLOC_009800		TCONS_00020046-XLOC_009387	n335603
ENST00000414107		ENST00000419800	n341567
TCONS_00019165-XLOC_009363		n341119	TCONS_l2_00005685-XLOC_l2_002994
n326689		TCONS_00010232-XLOC_004700	TCONS_l2_00020322-XLOC_l2_010508
TCONS_00021053-XLOC_009652		TCONS_00012494-XLOC_005296	n339020
TCONS_00021516-XLOC_010651		n340351	n342731
TCONS_00024494-XLOC_011814		ENST00000438994	n340075
NR_033972		n326336	n339187
n325301		TCONS_00016018-XLOC_007412	ENST00000434868
ENST00000413960		n326231	ENST00000547819
ENST00000514468		TCONS_l2_00013122-XLOC_l2_007058	TCONS_l2_00028203-XLOC_l2_014518
TCONS_00028805-XLOC_013878		TCONS_00021994-XLOC_010597	n377834
TCONS_00025234-XLOC_012507		TCONS_00011731-XLOC_005199	n335649
n379466		ENST00000422994	n335656
n340090		TCONS_00022517-XLOC_010841	TCONS_l2_00005785-XLOC_l2_003065
TCONS_00011621-XLOC_005934		n324406	TCONS_00019252-XLOC_009084
ENST00000506656		n338727	n335667
TCONS_00014812-XLOC_006889		TCONS_00004618-XLOC_002527	n340154
n325999		TCONS_00009907-XLOC_004319	TCONS_l2_00028151-XLOC_l2_014480
n340575		TCONS_00020551-XLOC_009864	TCONS_00009611-XLOC_004745
n332511		ENST00000505347	ENST00000415104
n405230		ENST00000455399	NR_024204
ENST00000515306		TCONS_00017010-XLOC_008064	TCONS_l2_00015391-XLOC_l2_007395
TCONS_l2_00031011-XLOC_l2_015917		TCONS_00010377-XLOC_004885	TCONS_00003587-XLOC_001371
TCONS_00008322-XLOC_003778		TCONS_00020451-XLOC_009783	n377761
TCONS_00024756-XLOC_012040		ENST00000514225	n332918
n338753		n324512
TCONS_00003106-XLOC_001852		ENST00000539206
TCONS_00029974-XLOC_014458		TCONS_00006273-XLOC_002874
TCONS_l2_00015394-XLOC_l2_007405		TCONS_00015268-XLOC_006765
TCONS_00008273-XLOC_003714		TCONS_00011621-XLOC_005934
n335160		ENST00000555362
TCONS_00017163-XLOC_007974		ENST00000427460
ENST00000457815		TCONS_00029702-XLOC_014378
n338761		ENST00000422744
n341787		TCONS_00008927-XLOC_003769
n409537		TCONS_00023519-XLOC_011361
n324934		n378160
TCONS_00025457-XLOC_012275		TCONS_00008532-XLOC_004022
ENST00000446337		n324526
ENST00000523317		TCONS_l2_00003340-XLOC_l2_001810
TCONS_00017637-XLOC_008296		ENST00000430905
n324892		n326495
TCONS_00003152-XLOC_001945		ENST00000435492
n341219		TCONS_l2_00015120-XLOC_l2_008443
TCONS_00003397-XLOC_002306		TCONS_00002290-XLOC_000702
n339947		n325379
TCONS_00028349-XLOC_013699		TCONS_00008254-XLOC_003691
ENST00000414409		TCONS_00001180-XLOC_000443
NR_040035		TCONS_l2_00024768-XLOC_l2_013000
n335669		TCONS_00028445-XLOC_013805
TCONS_00014161-XLOC_006144		TCONS_l2_00025237-XLOC_l2_012721
TCONS_00022698-XLOC_010988		TCONS_00010008-XLOC_004446
TCONS_l2_00020406-XLOC_l2_010571		TCONS_00021545-XLOC_010373
ENST00000450613		TCONS_00026308-XLOC_012653
n339136		TCONS_00004286-XLOC_002131
NR_001552		TCONS_00011744-XLOC_005209
TCONS_l2_00029235-XLOC_l2_015142		ENST00000537655
ENST00000393264		n344583
n332930		n380544
ENST00000559752		ENST00000522292
ENST00000422271		ENST00000438072
TCONS_00002017-XLOC_000167		n386512
ENST00000507681		TCONS_00013573-XLOC_006226
n340544		ENST00000416124
n338520		ENST00000452889
n341696		NR_001540
TCONS_00011336-XLOC_005372		ENST00000449841
TCONS_00003084-XLOC_001822		TCONS_00011746-XLOC_005211
TCONS_00011619-XLOC_005929		ENST00000443207
TCONS_l2_00024099-XLOC_l2_012440		TCONS_l2_00025363-XLOC_l2_012943
n380535		ENST00000519215
TCONS_l2_00020874-XLOC_l2_010936		n379409
ENST00000553963		ENST00000517407
TCONS_l2_00007086-XLOC_l2_003908		TCONS_00007462-XLOC_003429
ENST00000534388		ENST00000508563
TCONS_00006526-XLOC_003151		TCONS_00020905-XLOC_010184
n326651		ENST00000424592
TCONS_00021766-XLOC_010361		TCONS_l2_00026416-XLOC_l2_013737
TCONS_00029045-XLOC_013960		ENST00000508202
TCONS_00009258-XLOC_004525		TCONS_l2_00008039-XLOC_l2_004384
ENST00000440495		ENST00000519280
TCONS_00017999-XLOC_008862		ENST00000515306
TCONS_00022883-XLOC_011137		TCONS_00017762-XLOC_008343
ENST00000524011		n340339
n325184		ENST00000418567
n379805		ENST00000539116
TCONS_00020579-XLOC_009895		n323994
n324343		n341129
TCONS_00010500-XLOC_005020		TCONS_00006466-XLOC_003077
NR_026781		TCONS_l2_00017203-XLOC_l2_009199
TCONS_00008989-XLOC_003843		TCONS_00029742-XLOC_014415
TCONS_l2_00011572-XLOC_l2_005826		n326497
TCONS_00022629-XLOC_010931		ENST00000555655
ENST00000560586		TCONS_00006526-XLOC_003151
TCONS_l2_00025263-XLOC_l2_012747		ENST00000418539
TCONS_00029939-XLOC_014423		TCONS_00015718-XLOC_007465
TCONS_00029962-XLOC_014446		n340401
ENST00000424109		n326288
TCONS_00020751-XLOC_010039		TCONS_00011029-XLOC_004985
ENST00000520375		TCONS_00001510-XLOC_000854
TCONS_00005721-XLOC_003011		TCONS_00010246-XLOC_004707
TCONS_00024419-XLOC_011727		TCONS_00022597-XLOC_010903
TCONS_00026337-XLOC_012684		TCONS_00001853-XLOC_001241
ENST00000489626		n380775
n380676		ENST00000519983
TCONS_00015789-XLOC_007633		ENST00000452500
TCONS_00026298-XLOC_012642		n341765
ENST00000519983		TCONS_00027011-XLOC_013056
n341383		n338533
n326316		TCONS_00021862-XLOC_010456
TCONS_00014872-XLOC_006941		n385874
n339723		ENST00000437631
TCONS_l2_00000977-XLOC_l2_000735		TCONS_00026345-XLOC_012695
TCONS_00004256-XLOC_002098		TCONS_00013806-XLOC_006450
ENST00000431525		TCONS_l2_00014953-XLOC_l2_008316
n341002		ENST00000421147
ENST00000455576		TCONS_00000394-XLOC_000575
OTTHUMT00000125970		ENST00000428853
ENST00000412174		TCONS_00014788-XLOC_006862
n338843		ENST00000539009
ENST00000526851		TCONS_00016019-XLOC_007414
TCONS_00001510-XLOC_000854		ENST00000451090
TCONS_00026359-XLOC_012711		TCONS_00028883-XLOC_014022
TCONS_00007491-XLOC_003473		n338813
ENST00000428782		TCONS_00018027-XLOC_008910
ENST00000458662		ENST00000443771
TCONS_00007532-XLOC_003541		TCONS_00005769-XLOC_003104
n338420		n380980
n340230		TCONS_00019266-XLOC_009094
TCONS_00021052-XLOC_009651		TCONS_00009608-XLOC_004739
TCONS_00001037-XLOC_000302		TCONS_00012994-XLOC_006046
ENST00000454444		TCONS_l2_00021512-XLOC_l2_010549
n342180		ENST00000521558
n341057		TCONS_l2_00028267-XLOC_l2_014566
ENST00000452746		TCONS_l2_00019632-XLOC_l2_010451
TCONS_00009699-XLOC_004884		TCONS_00026360-XLOC_012712
TCONS_00024531-XLOC_011844		TCONS_00007624-XLOC_003690
n337713		TCONS_00007567-XLOC_003588
TCONS_00021619-XLOC_010555		TCONS_00022629-XLOC_010931
TCONS_00026883-XLOC_012946		ENST00000418679
n323988		ENST00000552470
ENST00000502647		TCONS_00022723-XLOC_011003
TCONS_00021280-XLOC_010001		TCONS_00006507-XLOC_003116
TCONS_00029949-XLOC_014434		n326689
TCONS_00029963-XLOC_014447		TCONS_00007043-XLOC_002927
TCONS_00010377-XLOC_004885		ENST00000507332
ENST00000539362		ENST00000431637
TCONS_00023440-XLOC_011282		ENST00000506460
TCONS_00027888-XLOC_013737		TCONS_00009572-XLOC_004689
TCONS_00024483-XLOC_011799		TCONS_00030015-XLOC_014500
n380245		TCONS_00021688-XLOC_010694
n339589		TCONS_l2_00025008-XLOC_l2_013189
TCONS_l2_00025370-XLOC_l2_012949		n339250
TCONS_00017633-XLOC_008290		TCONS_00018504-XLOC_008812
ENST00000453951		n332860
TCONS_00001326-XLOC_000616		ENST00000522767
TCONS_00002841-XLOC_001375		ENST00000505702
TCONS_00028445-XLOC_013805		TCONS_00004369-XLOC_002251
ENST00000421077		ENST00000454596
ENST00000452288		TCONS_00012342-XLOC_005894
TCONS_00029899-XLOC_014351		TCONS_00007189-XLOC_003162
ENST00000438566		TCONS_00010272-XLOC_004737
ENST00000505844		TCONS_00023634-XLOC_011433
TCONS_00026309-XLOC_012654		TCONS_00021657-XLOC_010626
ENST00000431139		TCONS_00003711-XLOC_001499
TCONS_00017904-XLOC_008696		ENST00000449923
ENST00000425405		NR_027421
TCONS_l2_00021217-XLOC_l2_011193		ENST00000470677
n339188		TCONS_00005049-XLOC_001924
TCONS_00018533-XLOC_008848		TCONS_00029436-XLOC_014273
TCONS_00001315-XLOC_000595		TCONS_00008021-XLOC_003485
TCONS_l2_00024454-XLOC_l2_012745		ENST00000523781
TCONS_00013749-XLOC_006389		ENST00000457815
ENST00000429507		n341309
TCONS_00003086-XLOC_001825		TCONS_00003106-XLOC_001852
n338451		ENST00000502680
ENST00000430033		n340313
TCONS_l2_00014953-XLOC_l2_008316		TCONS_00001220-XLOC_000493
TCONS_00015499-XLOC_007222		n325037
TCONS_l2_00023832-XLOC_l2_012148		n340790
TCONS_l2_00017980-XLOC_l2_009501		TCONS_00025743-XLOC_012560
ENST00000427804		n338793
TCONS_00027911-XLOC_013481		TCONS_l2_00011996-XLOC_l2_006424
ENST00000522028		TCONS_00002266-XLOC_000630
n324682		TCONS_00011678-XLOC_005158
TCONS_l2_00030611-XLOC_l2_015827		ENST00000446337
n324023		TCONS_00025101-XLOC_012121
TCONS_l2_00019431-XLOC_l2_010296		n341740
n324793		TCONS_00024018-XLOC_011373
n340765		ENST00000517695
n341563		TCONS_00007640-XLOC_003709
TCONS_00011630-XLOC_005117		ENST00000444605
TCONS_00010181-XLOC_004643		TCONS_00018702-XLOC_008433
n380167		TCONS_00000391-XLOC_000561
NR_001550		TCONS_l2_00020896-XLOC_l2_010948
n337973		TCONS_00013288-XLOC_005955
TCONS_00020576-XLOC_009892		n325221
TCONS_l2_00002906-XLOC_l2_001498		TCONS_l2_00024786-XLOC_l2_013014
NR_038835		n341181
n338495		TCONS_l2_00031035-XLOC_l2_015932
ENST00000429816		ENST00000450613
TCONS_00021415-XLOC_010215		n339098
TCONS_00013656-XLOC_006317		n326349
n339814		n341606
n323857		TCONS_00022518-XLOC_010842
n377682		n326394
TCONS_00012092-XLOC_005622		n342604
ENST00000440633		n324694
n346376		TCONS_00013445-XLOC_006098
ENST00000506934		ENST00000414409
ENST00000424761		TCONS_00026697-XLOC_012798
TCONS_00003271-XLOC_002076		ENST00000413567
TCONS_00029613-XLOC_014264		TCONS_00019285-XLOC_009118
TCONS_l2_00030891-XLOC_l2_015879		TCONS_00022526-XLOC_010851
TCONS_00020646-XLOC_009945		TCONS_00014447-XLOC_006664
n340589		ENST00000561316
TCONS_00021221-XLOC_009911		TCONS_00004750-XLOC_001432
TCONS_00001446-XLOC_000768		n380963
ENST00000556542		TCONS_00010676-XLOC_004360
TCONS_00003273-XLOC_002077		n341151
TCONS_00014880-XLOC_006948		TCONS_00010500-XLOC_005020
ENST00000433646		n339030
n337686		TCONS_00007891-XLOC_004145
TCONS_00013637-XLOC_006299		ENST00000424705
TCONS_00003223-XLOC_002008		TCONS_00012046-XLOC_005578
TCONS_00026386-XLOC_012736		n344970
TCONS_00001181-XLOC_000447		TCONS_00000926-XLOC_000169
TCONS_00011940-XLOC_005450		TCONS_00013088-XLOC_006273
TCONS_00021814-XLOC_010415		TCONS_00002569-XLOC_001174
TCONS_00025483-XLOC_012304		TCONS_00010868-XLOC_004695
TCONS_00003392-XLOC_002298		n340890
TCONS_l2_00019357-XLOC_l2_010244		TCONS_00003679-XLOC_001473
ENST00000420096		n338940
n385874		TCONS_00004485-XLOC_002378
TCONS_00012218-XLOC_005775		TCONS_00011618-XLOC_005928
n340882		ENST00000548006
n338939		TCONS_00020576-XLOC_009892
n339555		n325896
TCONS_00019373-XLOC_009198		TCONS_00024434-XLOC_011751
		n340230
		TCONS_00014812-XLOC_006889
		n324160
		TCONS_00009372-XLOC_004320
		TCONS_l2_00009063-XLOC_l2_004913
		ENST00000512965
		TCONS_l2_00031012-XLOC_l2_015918
		ENST00000441790
		TCONS_00029438-XLOC_014275
		n338439
		NR_038904
		n380472
		TCONS_00007825-XLOC_004073
		ENST00000509015
		ENST00000444130
		TCONS_00026366-XLOC_012716
		ENST00000448475
		ENST00000431411
		ENST00000514468
		TCONS_00006267-XLOC_002870
		n323995
		TCONS_00013402-XLOC_006034
		n325870
		TCONS_00013397-XLOC_006027
		TCONS_00017273-XLOC_008087
		n324697
		n380666
		n339920
		TCONS_00000282-XLOC_000362
		n338339
		ENST00000502100
		n339406
		n325239
		TCONS_00024756-XLOC_012040
		n380535
		n325733
		n340385
		TCONS_00018333-XLOC_008611
		n325426
		ENST00000427145
		TCONS_00000683-XLOC_001093
		TCONS_l2_00007938-XLOC_l2_004327
		ENST00000521051
		n338246
		n340973
		n325573
		ENST00000432559
		ENST00000486726
		TCONS_00013682-XLOC_006344
		n341700
		TCONS_00028425-XLOC_013777
		TCONS_l2_00022964-XLOC_l2_012107
		n340721
		ENST00000442260
		TCONS_00014859-XLOC_006928
		n325700
		ENST00000455307
		TCONS_00000039-XLOC_000162
		TCONS_00014880-XLOC_006948
		ENST00000506250
		n342079
		ENST00000533329
		TCONS_00023307-XLOC_011177
		ENST00000437523
		ENST00000440208
		TCONS_l2_00028458-XLOC_l2_014098
		n340613
		ENST00000446601
		TCONS_00028641-XLOC_013690
		TCONS_00016476-XLOC_007848
		TCONS_00013438-XLOC_006084
		TCONS_00007735-XLOC_003914
		TCONS_00000348-XLOC_000491
		n324132
		TCONS_00006165-XLOC_002770
		TCONS_00028939-XLOC_014086
		TCONS_00016269-XLOC_007645
		ENST00000434730
		n341906
		NR_034037
		n325304
		ENST00000533106
		n340485
		ENST00000444032
		TCONS_00002824-XLOC_001353
		TCONS_00007688-XLOC_003808
		TCONS_00000665-XLOC_001077
		ENST00000425185
		TCONS_00006139-XLOC_002745
		n332991
		n325661
		TCONS_00016239-XLOC_007622
		ENST00000450776
		n338601
		TCONS_00020349-XLOC_009680
		TCONS_00015989-XLOC_007368
		n324352
		TCONS_l2_00027510-XLOC_l2_014034
		TCONS_00010092-XLOC_004549
		TCONS_00015650-XLOC_007286
		TCONS_00003883-XLOC_001684
		n325848
		n324976
		TCONS_00003518-XLOC_002531
		TCONS_00004124-XLOC_001969
		TCONS_00017870-XLOC_008619
		ENST00000506070
		TCONS_00000191-XLOC_000170
		TCONS_00008213-XLOC_003674
		TCONS_00000736-XLOC_001211
		n338297
		ENST00000436974
		TCONS_00021740-XLOC_010330
		ENST00000453951
		TCONS_00004363-XLOC_002243
		TCONS_00028412-XLOC_013766
		TCONS_00011481-XLOC_005678
		TCONS_00015740-XLOC_007534
		ENST00000551565
		TCONS_l2_00005153-XLOC_l2_002742
		TCONS_00011487-XLOC_005713
		TCONS_00020936-XLOC_010207
		n342904
		TCONS_00015084-XLOC_007149
		TCONS_00007806-XLOC_004031
		n339480
		n337146
		TCONS_00021496-XLOC_010433
		n340404
		TCONS_00020523-XLOC_009840
		n342430
		TCONS_00006443-XLOC_003050
		ENST00000414116
		n380805
		n324470
		ENST00000458480
		TCONS_00018319-XLOC_008597
		ENST00000536572
		ENST00000552028
		n385873
		ENST00000554926
		TCONS_00000527-XLOC_000849
		TCONS_00022085-XLOC_010692
		ENST00000560376
		n410192
		ENST00000477499
		n410748
		ENST00000537293
		TCONS_00023797-XLOC_011590
		TCONS_00007651-XLOC_003726
		TCONS_00011881-XLOC_005375
		ENST00000550874
		TCONS_00021280-XLOC_010001
		ENST00000434562
		n323970
		TCONS_00028251-XLOC_013594
		TCONS_00029366-XLOC_014170
		OTTHUMT00000320304
		n324178
		TCONS_00015022-XLOC_007096
		TCONS_00020591-XLOC_009908
		TCONS_00001491-XLOC_000831
		TCONS_00015808-XLOC_007687
		n324040
		ENST00000391625
		TCONS_00003692-XLOC_001483
		TCONS_00011631-XLOC_005119
		TCONS_l2_00013712-XLOC_l2_007377
		TCONS_00013220-XLOC_006555
		TCONS_00014810-XLOC_006886
		TCONS_00015040-XLOC_007121
		TCONS_00027298-XLOC_013298
		TCONS_00009414-XLOC_004417
		NR_024443
		TCONS_00020406-XLOC_009734
		ENST00000412695
		TCONS_00020536-XLOC_009850
		n325709
		n342666
		n337734
		TCONS_00020937-XLOC_010208
		TCONS_00004889-XLOC_001676
		n340728
		ENST00000430545
		TCONS_l2_00011669-XLOC_l2_006125
		TCONS_00028854-XLOC_013966
		n341519
		n340961
		NR_038837
		TCONS_00028806-XLOC_013880
		TCONS_00012997-XLOC_006050
		TCONS_00022035-XLOC_010634
		n324638
		TCONS_00016665-XLOC_007505
		ENST00000430033
		n377754
		TCONS_00011689-XLOC_005165
		ENST00000306533
		TCONS_00007724-XLOC_003900
		TCONS_00013175-XLOC_006448
		TCONS_00007771-XLOC_003964
		TCONS_l2_00011572-XLOC_l2_005826
		ENST00000427319
		ENST00000411956
		ENST00000443714
		TCONS_00016289-XLOC_007665
		TCONS_00024483-XLOC_011799
		TCONS_00017999-XLOC_008862
		TCONS_00019753-XLOC_009547
		TCONS_00009908-XLOC_004321
		ENST00000547515
		TCONS_l2_00029895-XLOC_l2_015100
		TCONS_00001333-XLOC_000628
		ENST00000517706
		n324023
		ENST00000538041
		ENST00000462011
		TCONS_l2_00017898-XLOC_l2_009467
		n325748
		n325075
		n340319
		NR_040098
		n340858
		TCONS_00021747-XLOC_010339
		TCONS_l2_00002935-XLOC_l2_001520
		ENST00000509964
		ENST00000435092
		n333903
		ENST00000520370
		TCONS_00022820-XLOC_011091
		TCONS_00012340-XLOC_005890
		ENST00000561182
		TCONS_00023278-XLOC_011482
		TCONS_00011810-XLOC_005283
		TCONS_00023794-XLOC_011588
		TCONS_00024349-XLOC_011671
		ENST00000548488
		n338586
		n324075
		ENST00000440935
		ENST00000422198
		n323892
		TCONS_l2_00008970-XLOC_l2_004860
		ENST00000414382
		TCONS_l2_00013902-XLOC_l2_007499
		n324965
		TCONS_00018075-XLOC_009006
		TCONS_00010470-XLOC_004991
		ENST00000538297
		TCONS_00002954-XLOC_001593
		TCONS_00007966-XLOC_003435
		ENST00000443971
		ENST00000523166
		TCONS_00025387-XLOC_012200
		TCONS_00001827-XLOC_001208
		TCONS_00029686-XLOC_014355
		TCONS_00016338-XLOC_007718
		TCONS_l2_00031032-XLOC_l2_015930
		n324356
		TCONS_00025697-XLOC_012525
		TCONS_00004370-XLOC_002253
		TCONS_00004484-XLOC_002377
		n339612
		n337588
		TCONS_00005126-XLOC_002040
		n377695
		TCONS_00024351-XLOC_011673
		ENST00000527727
		TCONS_00003359-XLOC_002249
		ENST00000412445
		ENST00000423153
		TCONS_l2_00030891-XLOC_l2_015879
		n339749
		ENST00000497872
		TCONS_00008500-XLOC_003973
		TCONS_00001282-XLOC_000569
		TCONS_00019731-XLOC_009524
		TCONS_l2_00028464-XLOC_l2_014111
		ENST00000431981
		TCONS_00013010-XLOC_006097
		TCONS_00026184-XLOC_012865
		n380593
		n344542
		n378499
		TCONS_00019241-XLOC_009072
		TCONS_00015440-XLOC_007088
		ENST00000503815
		TCONS_00016439-XLOC_007807
		n326602
		TCONS_00023896-XLOC_011198
		TCONS_00015722-XLOC_007483
		n326616
		TCONS_00017515-XLOC_008172
		TCONS_00008169-XLOC_003613
		TCONS_00029420-XLOC_014228
		TCONS_l2_00003008-XLOC_l2_001569
		ENST00000416509
		n338692
		TCONS_00016057-XLOC_007447
		TCONS_00000804-XLOC_000019
		TCONS_00028962-XLOC_013853
		ENST00000421297
		TCONS_00019530-XLOC_009325
		ENST00000486767
		ENST00000425609
		TCONS_00000600-XLOC_000955
		TCONS_00003664-XLOC_001454
		ENST00000512571
		TCONS_00018285-XLOC_008563
		ENST00000545750
		ENST00000415820
		TCONS_00009533-XLOC_004593
		NR_033917
		n324682
		TCONS_00001139-XLOC_000387
		TCONS_00011630-XLOC_005117
		TCONS_00018424-XLOC_008719
		TCONS_00010119-XLOC_004585
		ENST00000515218
		TCONS_00017945-XLOC_008766
		TCONS_00023541-XLOC_011374
		ENST00000430672
		TCONS_l2_00004831-XLOC_l2_002509
		TCONS_00018283-XLOC_008561
		ENST00000544399
		TCONS_00000690-XLOC_001098
		TCONS_00000609-XLOC_000977
		TCONS_00025556-XLOC_012385
		ENST00000433646
		ENST00000411554
		TCONS_l2_00001638-XLOC_l2_001206
		TCONS_00006737-XLOC_003375
		NR_026781
		ENST00000445098
		n380825
		ENST00000437748
		n340234
		TCONS_00015680-XLOC_007365
		ENST00000529922
		ENST00000557062
		ENST00000449485
		TCONS_l2_00028459-XLOC_l2_014099
		TCONS_l2_00028534-XLOC_l2_014420
		n323829
		TCONS_00028995-XLOC_013914
		n325367
		TCONS_00011254-XLOC_005132
		TCONS_00000738-XLOC_001214
		TCONS_00020375-XLOC_009707
		TCONS_00019373-XLOC_009198
		ENST00000420224
		TCONS_00016407-XLOC_007778
		TCONS_l2_00013180-XLOC_l2_007097
		TCONS_00008989-XLOC_003843
		n324338
		ENST00000420204
		TCONS_00027863-XLOC_013502
		n380676
		n334619
		n341812
		TCONS_00012002-XLOC_005515
		TCONS_00019749-XLOC_009543
		ENST00000504204
		n335161
		TCONS_00012543-XLOC_005377
		TCONS_00006571-XLOC_003198
		TCONS_00015324-XLOC_006872
		NR_015376
		TCONS_00013979-XLOC_006618
		ENST00000553270
		TCONS_00029617-XLOC_014272
		ENST00000412647
		NR_024236
		ENST00000537498
		ENST00000432694
		TCONS_00011286-XLOC_005242
		ENST00000546615
		TCONS_00026281-XLOC_012627
		TCONS_00029597-XLOC_014246
		n325480
		TCONS_00027915-XLOC_013494
		TCONS_00021940-XLOC_010534
		TCONS_00009500-XLOC_004534
		TCONS_00017904-XLOC_008696
		ENST00000513711
		TCONS_00029953-XLOC_014439
		ENST00000549104
		ENST00000428920
		TCONS_l2_00002788-XLOC_l2_001347
		TCONS_00017061-XLOC_008171
		ENST00000458627
		NR_028083
		TCONS_00021745-XLOC_010336
		ENST00000457858
		TCONS_00011369-XLOC_005462
		TCONS_00025126-XLOC_012293
		TCONS_00006302-XLOC_002903
		ENST00000448738
		n323873
		n342896
		TCONS_00005490-XLOC_002569
		ENST00000442567
		n380457
		TCONS_00019477-XLOC_009280
		TCONS_00019142-XLOC_009095
		n324793
		ENST00000503267
		TCONS_00015945-XLOC_007321
		TCONS_00016201-XLOC_007591
		TCONS_00013447-XLOC_006100
		TCONS_l2_00019874-XLOC_l2_009867
		ENST00000518330
		n340853
		ENST00000421181
		TCONS_00012214-XLOC_005768
		TCONS_00004264-XLOC_002105
		ENST00000443602
		TCONS_00001181-XLOC_000447
		n336909
		TCONS_00021530-XLOC_010310
		TCONS_00027927-XLOC_013521
		n325825
		ENST00000438791
		TCONS_00017637-XLOC_008296
		n345064
		n377708
		TCONS_00026336-XLOC_012683
		TCONS_l2_00011858-XLOC_l2_006322
		ENST00000534584
		ENST00000424569
		TCONS_00009685-XLOC_004858
		n339206
		n342806
		ENST00000439844
		TCONS_00001085-XLOC_000329
		ENST00000456118
		ENST00000419362
		n337246
		n338929
		ENST00000412295
		TCONS_00019041-XLOC_008978
		ENST00000504165
		n340665
		TCONS_l2_00015976-XLOC_l2_008273
		TCONS_l2_00029386-XLOC_l2_015224
		ENST00000417609
		ENST00000547094
		NR_024270
		TCONS_00025131-XLOC_012335
		n325189
		TCONS_l2_00027191-XLOC_l2_013554
		TCONS_l2_00025984-XLOC_l2_013463
		ENST00000449316
		ENST00000555636
		ENST00000417989
		ENST00000412221
		ENST00000520149
		ENST00000478824
		ENST00000434707
		n387576
		n341004
		TCONS_00003762-XLOC_001564
		ENST00000486508
		ENST00000438416
		n332472
		TCONS_00025656-XLOC_012482
		TCONS_00017914-XLOC_008713
		TCONS_00006492-XLOC_003094
		TCONS_l2_00002250-XLOC_l2_000522
		n326768
		ENST00000433315
		ENST00000393264
		TCONS_00026955-XLOC_013013
		ENST00000507299
		ENST00000412872
		ENST00000558818
		TCONS_00027227-XLOC_013265
		ENST00000535163
		OTTHUMT00000364920
		n380809
		ENST00000558860
		ENST00000448204
		n341590
		TCONS_l2_00004090-XLOC_l2_001841
		TCONS_00013164-XLOC_006433
		TCONS_00021415-XLOC_010215
		TCONS_00000694-XLOC_001114
		TCONS_00020641-XLOC_009943
		n337071
		TCONS_00001446-XLOC_000768
		TCONS_00029178-XLOC_014118
		n341967
		TCONS_00003151-XLOC_001944
		n324462

## Sheet: mRNA
MDR-TB up-regulated	MDR-TB dwn-regulated	DS-TB up-regulated	DS-TB down-regulated
HIST1H1B	AGAP7	DEFA1B	KLRB1
ZBTB12	AGAP6	S100A12	STRADB
IGHV1-8	KLRB1	RNASE2	BCAS2
CHST7	NKG7	TAS2R42	UBA52
DEFA4	GZMA	MMP8	CCNH
IGLV3-25	P2RY13	CEACAM8	RIOK3
HIST2H2AA4	ATF7IP	OR2L2	RPS11
TPBGL	HSPA8	OR4F4	AGAP6
TMEM247	MYBL1	DEFA4	AGAP7
KCTD11	HEMGN	LOC650293	RPS5
ENST00000456337	SAMHD1	PRR21	TNFAIP3
IGHD3-22	GZMK	OR51L1	NR4A2
GINM1	HIST1H2AG	TRAV8-7	OAZ1
OR52D1	FGFBP2	OR4X2	SRSF7
OR2T29	CNOT1	OR2B3	FOSB
ENST00000396843	LUZP6	OR14J1	FGFBP2
TSPY2	STOM	OR4F6	MBNL3
GALR3	RPS3	MS4A3	GZMA
OR51B4	RBL2	OR52A5	EEF2
OR52I2	RPS4X	S100A8	RPS13
SPRY2	FAXDC2	DEFB129	RPL24
TRAV9-1	MAP3K5	KRTAP26-1	RPS16
ATOH7	IQGAP2	LTF	FBXO7
HEXIM2	BPTF	PGLYRP1	RPS19
C9orf106	GMPS	KRTAP5-6	RPL18A
RAB39A	HIST1H2BF	RPL36AP33	RPL19
AQP2	CLNS1A	OR5D16	RPS4X
OR1K1	PHKB	OR9G4	SLC25A6
NXNL1	KMT2A	KRTAP5-1	PSME4
CST4	ANKRD44	HP	RPL4
ANKRD63	PRKCA	OLFM4	PIP4K2A
ZNF165	MS4A1	OR2AT4	PSMA3
SPINK14	FAIM3	SLCO4C1	EIF3M
RNF223	PSMG2	OR4F17	USP12
CBY3	AGAP4	LCE1D	TC2N
SPINK1	PDS5A	CD177	GZMH
RP2	PLAC8	IGLJ6	TMEM66
NCS1	RAB10	OR10Z1	PABPC1
OR4K17	FOXN2	OR11L1	RPS15
CCL27	LDHB	OR2A5	HIST1H2AC
LRRC10	USP17	WFDC13	CHD1
NUPR1L	NT5C3A	IGHD2-2	RPS25
C1orf68	IKZF3	OR9G1	NKG7
ENST00000531602	CAPRIN2	FIGLA	DENND4A
HES3	CMC2	ORM2	RPL26
SH3D21	IKZF1	RNASE3	HEMGN
GUCA2A	ATP5C1	OR1D5	RPS27
TCF24	PTPN4	OR10H3	LUZP6
ENST00000319817	NEK7	OR2T35	SMDT1
CGB	FLI1	OR2A2	ARL6IP1
GAREML	PRKCH	SPRR2E	RPL8
ULBP2	SELPLG	OR4D5	GPX1
OR2W1	CA5B	OR10H4	HCAR2
MBD3L5	PRPS1	CAMP	EIF1AX
PRR19	CTCF	NPFFR1	ANKRD12
LRRC15	REXO2	TRBV7-1	RPS3
IGLV10-54	CD2	KRTAP25-1	TMSB10
HES1	RAD23B	TAS2R39	JAK1
SDHAF1	GZMB	OR13C4	EEF1G
PNMA3	FBL	C17orf74	RNF114
RBMXL3	FOPNL	OR4K17	RPL27
C19orf71	C11orf30	OR52N4	GABARAPL2
THAP4	NFATC3	KRTAP29-1	HSPA8
RAMP2	AGAP9	IGLV3-25	RPS12
C12orf68	MNAT1	SIX2	FAXDC2
KRTAP10-8	STRN	OR10A4	RPS2
CABLES2	REPS2	MC5R	BNIP3L
C9orf172	C10orf76	IGLV10-54	HSPA5
TSPY8	KPNA5	OR7E24	COX8A
TSPY3	HSPE1	IGLV7-46	SWT1
TRBV11-1	RORA	ORM1	ODC1
IFNA5	CSE1L	MTRNR2L10	NDUFA6
ENST00000330758	SKAP1	OR52E2	RPLP0
ACTRT3	MRPS14	KRTAP10-11	RGS10
IGHV3-73	RASGRP1	TMEM247	C14orf166
IGHV5-51	LPCAT3	OR4D2	BHLHE40
TXNDC2	TRDJ1	SPRR1A	RPL11
GPRIN2	HIST1H2BO	OR10G8	COPS2
CCL22	NHLRC2	PHGR1	CORO1C
KRTAP10-5	TERF2	DEFB121	HERPUD1
CALML5	HIST1H2BJ	LCN2	FAIM3
TSPY4	GLG1	ENST00000400553	MRPS7
SPINK2	CSNK2A1	BPI	RPS29
DCUN1D3	KRIT1	ATOH7	PAIP2
NPAP1	ATP2B4	DEFB1	UCP2
MSC	PSIP1	OR2T11	EIF1
B3GNT9	WDR59	LCE1E	UBQLN1
MAFG	SS18	ENST00000313865	ERN1
IGHV3-38	MPHOSPH9	GAGE2D	RPS21
IFNA16	CEP120	IGKV1D-43	NGRN
NANOS3	TRAV12-1	OR10V1	DDX24
GIP	TMEM43	LCE3B	ZC3H6
TSPY10	RPS14	OR10P1	EIF3J
PRAMEF19	IGHM	KRTAP19-5	PRKCH
APOA1	ARL2BP	KRTAP22-2	ETFA
C11orf94	AHCYL1	OR2T2	RPLP2
KRTAP16-1	KLHDC10	SCGB2B2	LDHB
ATP2C2	POLE2	OR6C75	KIAA2026
SCGB2B2	PIAS2	OR10G3	SRRM2
	ATXN10	KRTAP4-11	UQCRHL
	MOSPD2	OR10Q1	RAB8A
	UPF2	OR52D1	NPM1
	BCAS3	ENST00000558188	RPL38
		OR7A5	RPL9
		ENST00000356374	PPP2R5C
		KRTAP5-5	EEF1A1
		HBG2	ZNF622
		IGKV3D-20	UBE2D2
		KRTAP4-3	EMC3
		UBQLNL	PAPD4
		IGKV1D-16	RPS10
		TAS2R43	MXI1
		KRTAP5-11	NDUFS5
		FOLR4	RPS15A
		DEFB131	TOP1
		CCL27	USP25
		KCNK18	RPL41
		LIN7A	TOMM7
		C11orf34	DNAJC7
		TRBV11-1	CCL5
		ANKRD22	RPL6
		TAS2R5	FBL
		IGLV9-49	PSMG2
		LCE2A	RASA3
		ENST00000553678	PPM1A
		MRGPRX2	POLR2K
		IL34	GTF3A
		OR2G3	GTF2A2
		GPR141	CAPRIN2
		DPCR1	UBL5
		ANP32D	TRIAP1
		C16orf97	IGBP1
		KRTAP20-3	SLAIN2
		NPHS2	RPS28
		CDRT15L2	PSMA2
		CD24	DEK
		HPGDS	DNAJA1
		MPZL3	RPL12
		CEACAM6	ASNA1
		OR5D18	CNOT2
		FAM197Y1	RPL14
		ZG16	HAUS1
		GJB5	CNBP
		CT62	TRAPPC1
		SPRR2B	GMPS
		CBY3	PIM2
		SPRR4	CDC26
		KRTAP4-12	DCTN6
		SERPINA11	PAG1
		TMEM95	TPT1
		BTBD18	RPLP1
		GPR179	PPP1CB
		HRNR	ATP1B3
		OR6B2	SDAD1
		TRBV5-3	HNRNPDL
		GHDC	RPL7
		OR51Q1	PDS5A
		KRTAP6-1	USP16
		KRTAP5-4	SEPW1
		OR2F1	CPSF6
		IGHV1OR21-1	DCUN1D1
		CRYBA1	GABARAPL1
		CLPS	EIF4A3
		ENST00000558592	SCYL2
			UQCR10
			RPS6
			PSMB4
			PFDN5
			CLNS1A
			ST13
			NAA38
			ISCA1
			RBM12
			ECD
			NT5C3A
			CYCS
			CDC73
			JMY
			UQCRH
			MAP4K5
			ANP32B
			HNRNPU
			RPL18
			SNRPD1
			BRD7
			IGHM
			FOPNL
			ZBTB44
			HEXIM1
			RNF11
			STRAP
			HSPA9
			REL
			CDV3
			NFATC3
			RPL30
			ISG20L2
			RPS23
			XRN1
			RPL10A
			FOXO1
			NGDN
			ADNP2
			MRFAP1L1
			NONO
			TPM4
			SNAP23
			RPSA
			RARS
			PSMD5
			TAF10
			CDC27
			RPL15
			ITGAL
			FAU
			HNRNPA0
			HAT1
			RPL23
			STX11
			UBL3
			GLYR1
			FNBP1
			IKZF3
			SKP1
			GTPBP1
			RPIA
			AGAP4
			SKAP1
			PCMTD2
			PTPN4
			FLNA
			PAFAH1B1
			SEPT6
			GNB2L1
			TRAPPC5
			USP36
			TRDJ1
			SMARCC1
			ATF4
			RORA
			FMR1
			DNAJC8
			LIN7C
			MS4A1
			DCAF5
			USP14
			AKAP7
			RSF1
			DEFB104A
			BC008667
			CIRBP
			RPL36
			PTPN12
			EIF3D
			UBE2F
			ATP5C1
			CSTF2T
			RPS20
			RPS14
			ANAPC16
			FLI1
			PDCD10
			BCL10
			CSE1L
			TAGLN2
			NSMCE1
			HSPE1
			CLTA
			GPX4
			MNAT1
			P2RY8
			C10orf76
			ZFP36L2
			RPS17
			FAM96B
			LPXN
			TAF15
			PTGES3
			RASGRP1
			SEC24B
			PIK3C2A
			C7orf41
			DNAJA2
			PLA2G12A
			SNRNP27
			ZEB1
			MAPRE2
			DSTN
			UFC1
			PA2G4
			CEP192
			KPNA5
			PEBP1
			TUBA4A
			MED10
			THRAP3
			TROVE2
			STIL
			C1QBP
			EIF3L
			MRPS21
			ARL2BP
			ZBTB1
			GLTSCR2
			RPAP2
			KARS
			IGKV2-40
			PPP3R1
			OCIAD2
			CEP120
			RPL13
			FAM91A1
			MYO9B
			P2RX1
			ZBTB4
			TRANK1
			CAMLG
			RPS8
			LPCAT1
			PDZK1IP1
			OTUD5
			CUTA
			POLE2
			PSMB1
			SLTM
			BFAR
			CDC37
			NAPG
			ADI1
			TMEM140
			ELAVL1
			RAD23B
			RBL1
			SNRPD2
			NUP54
			RPS27A
			CISD2
			WHAMM
			KHDRBS1
			ANKIB1
			NUS1
			LSM7
			SEC31A
			SARNP
			TRAJ1
			MTA2
			HECA
			TCEAL8
			NOB1
			SH2D1B
			TRPC4AP
			TAF2
			TIMM8B
			BLOC1S5
			RNASEH2B
			RPS9
			STYX
			BC035371
			RPL22
			PIGK
			GLG1
			TMEM126A
			RABEP1
			APRT
			LTB
			SS18
			NOLC1
			TRBV23-1
			WDR83OS
			LGALSL
			NLRP1
			HNRNPUL1
			SF3B14
			TERF2
			NARG2
			PCGF5
			RBM7
			CHMP4A
			TRMT10C
			UQCR11
			DNAJB6
			C6orf48
			WDR67
			KIAA1143
			SPTY2D1
			PARK7
			ATP6V1F
			AKIRIN1
			USPL1
			TUBB4B
			CHORDC1
			WDR43
			MEX3C
			SSR2
			ILK
			IGHJ5
			CDK8
			KIAA1191
			RPL34
